# Supplementary material
Source: PubMed Central journal article supplement (PMC6709500)
Supplement: AAC.00756-19-s0010.pdf [file AAC.00756-19-s0010.pdf]

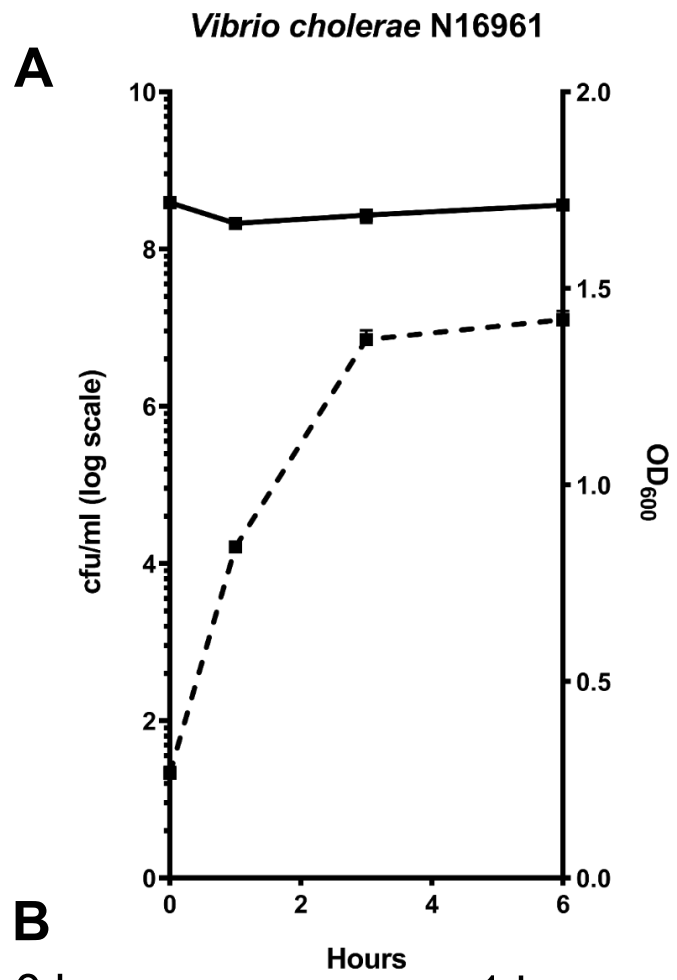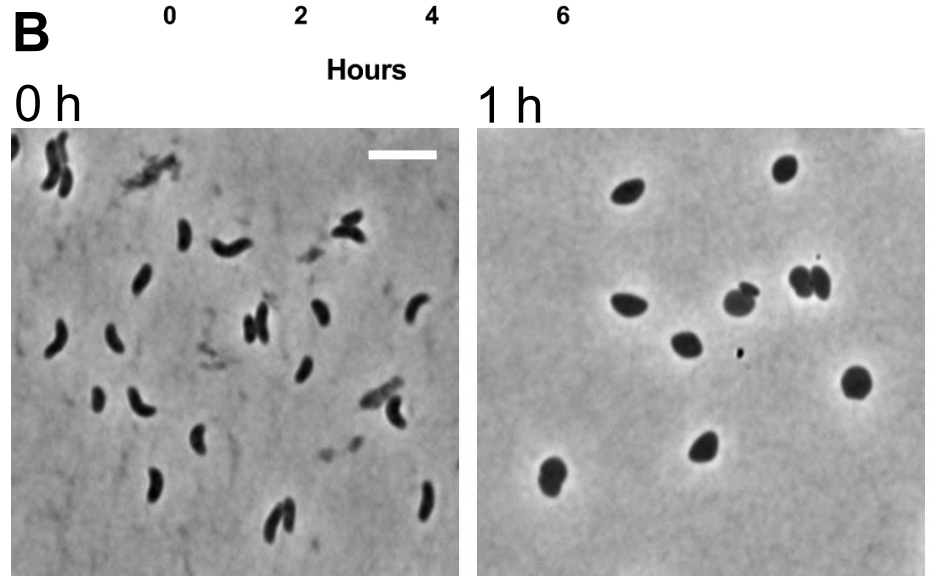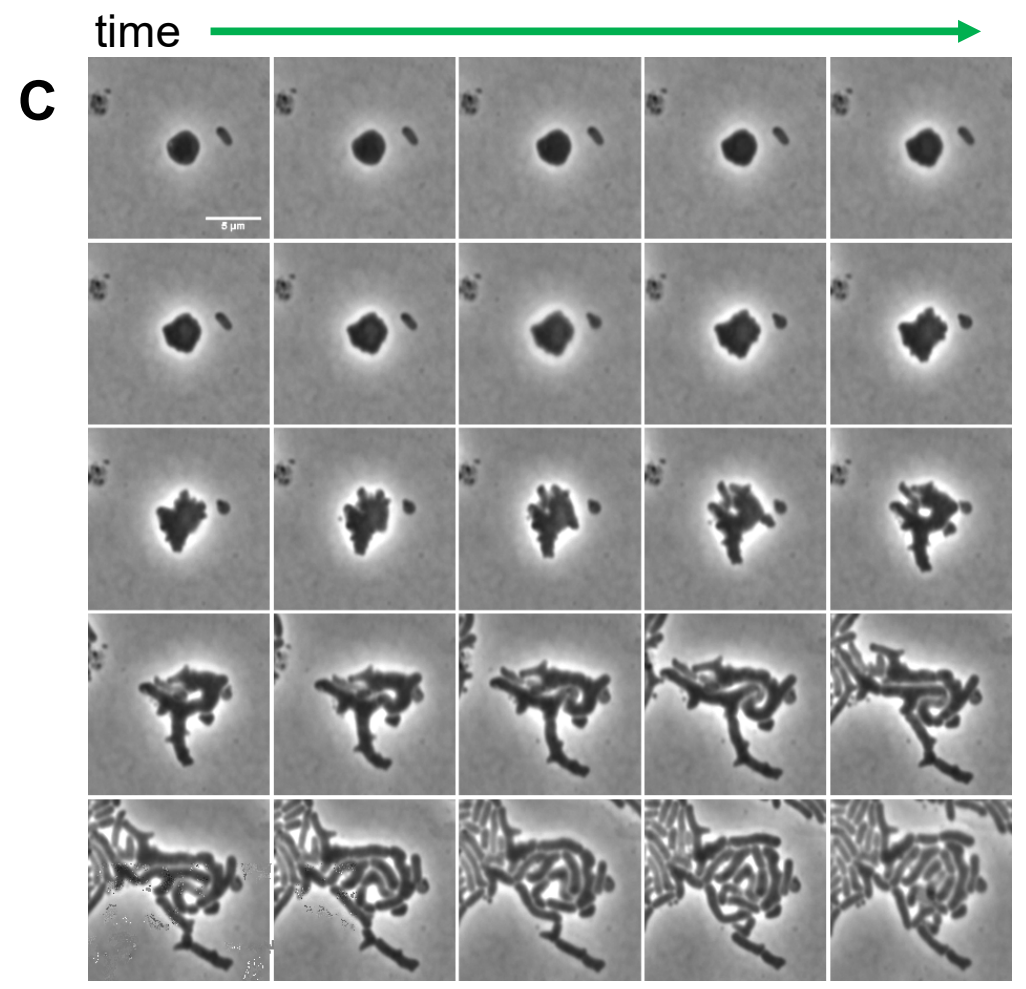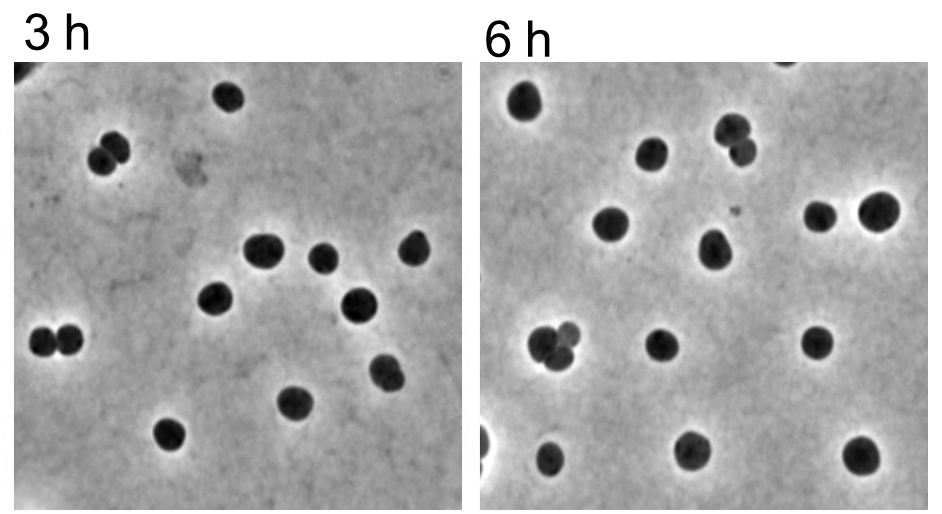

Fig. S1

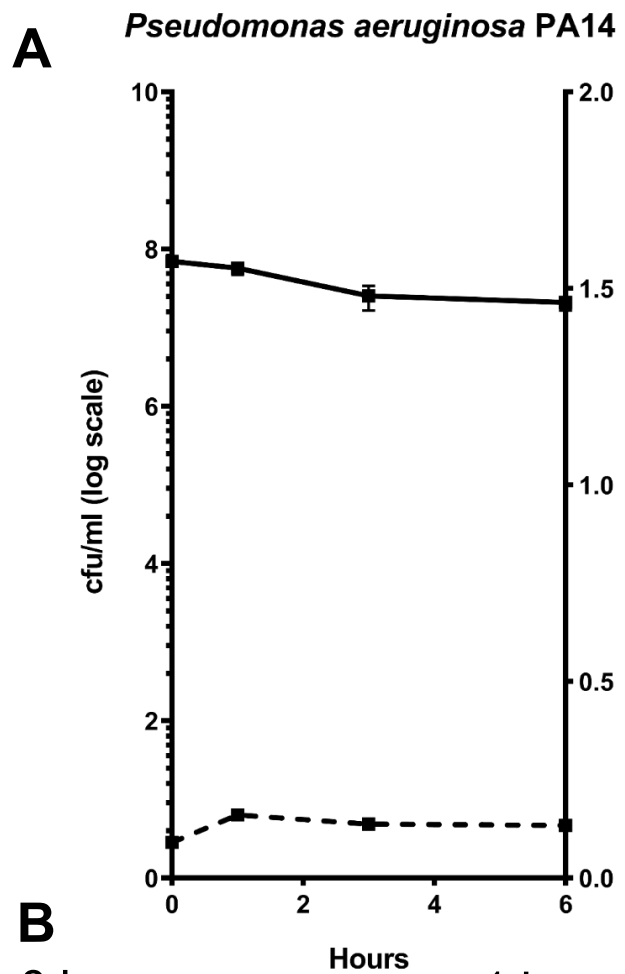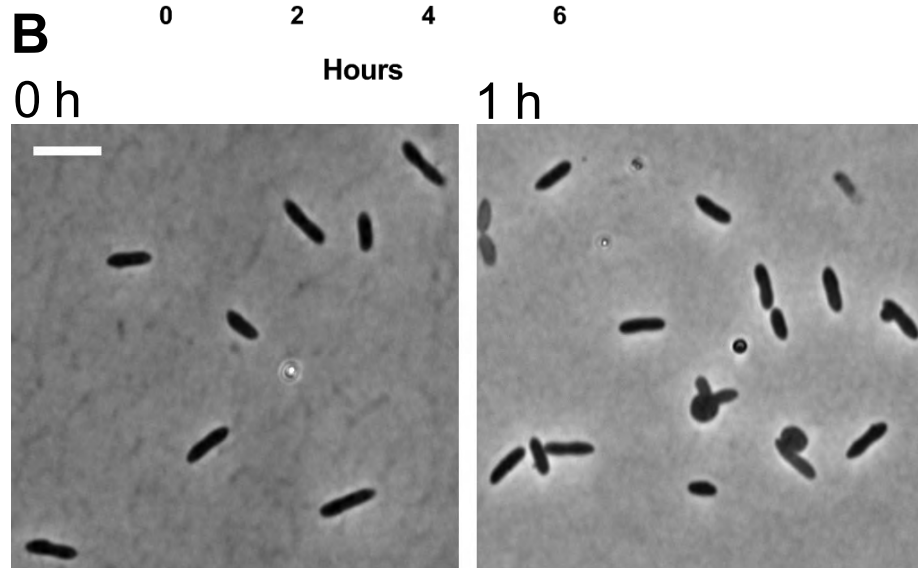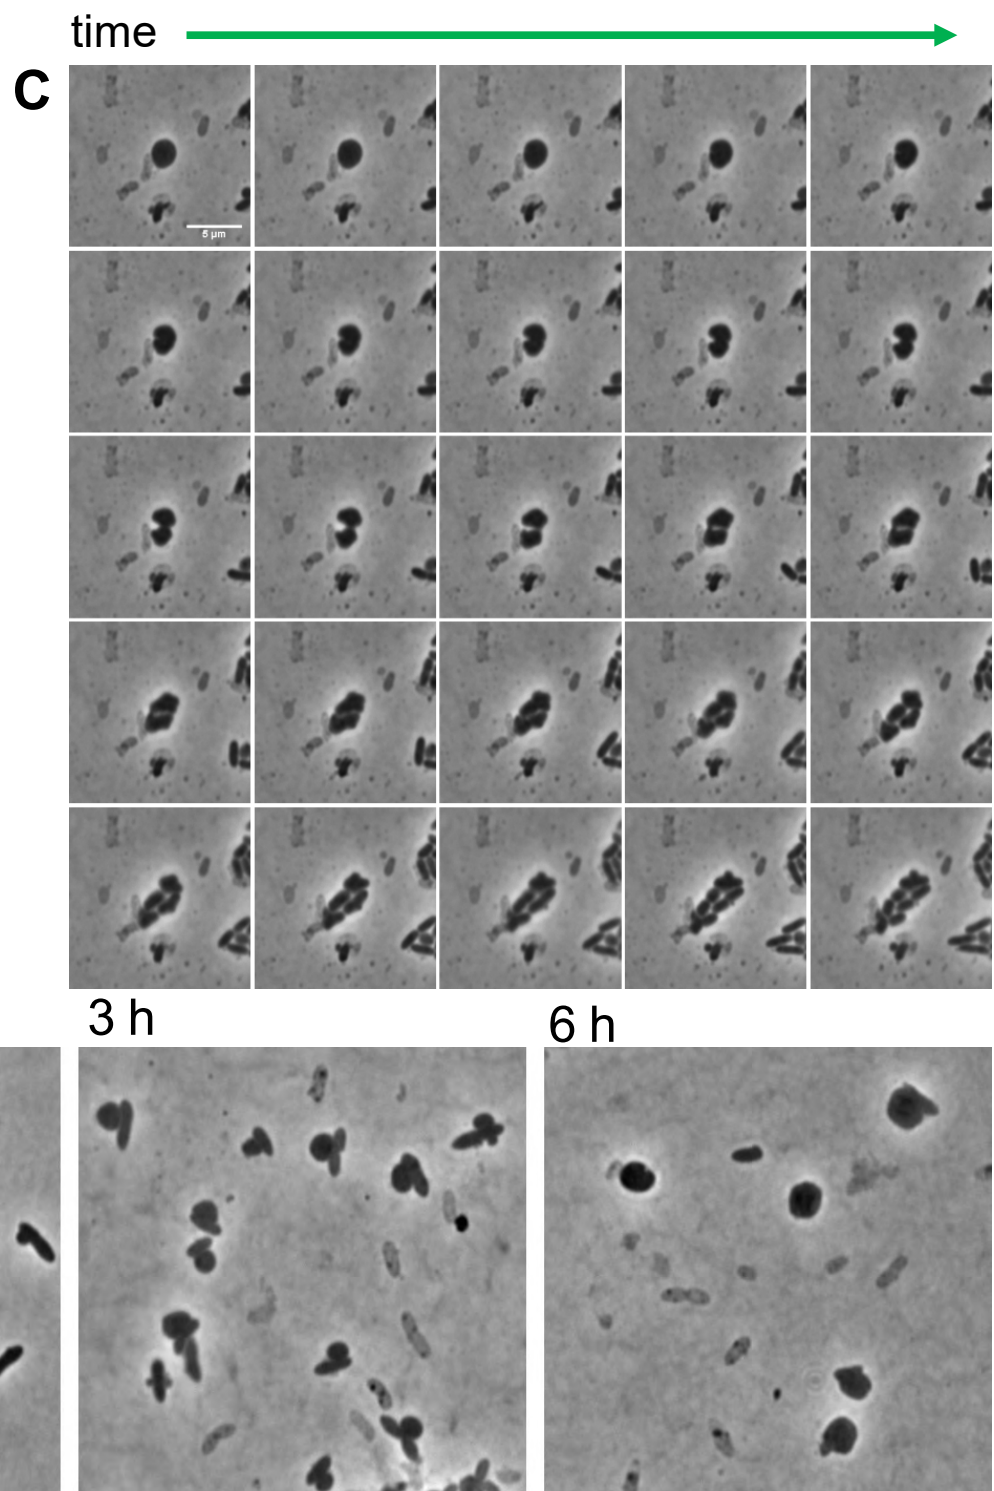

Fig. S2

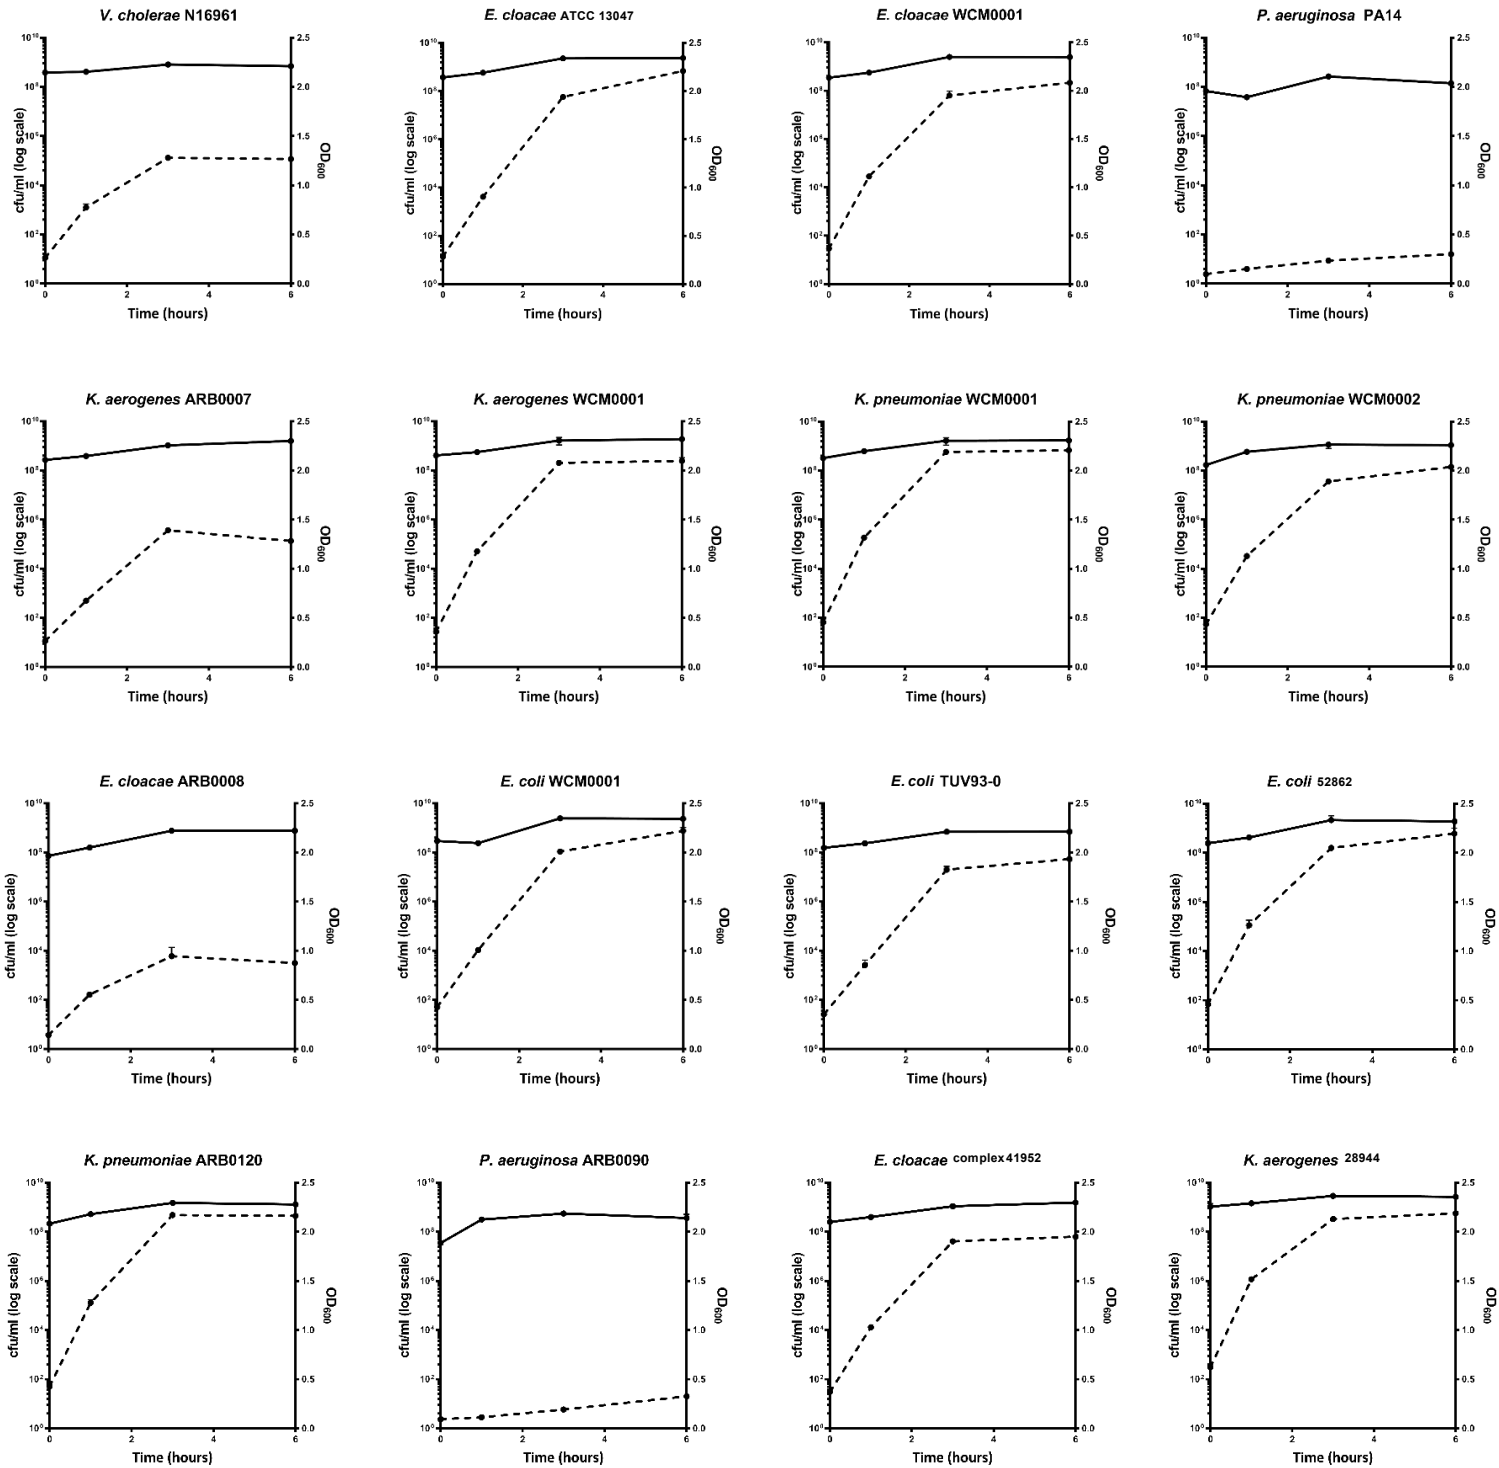

Fig. S3

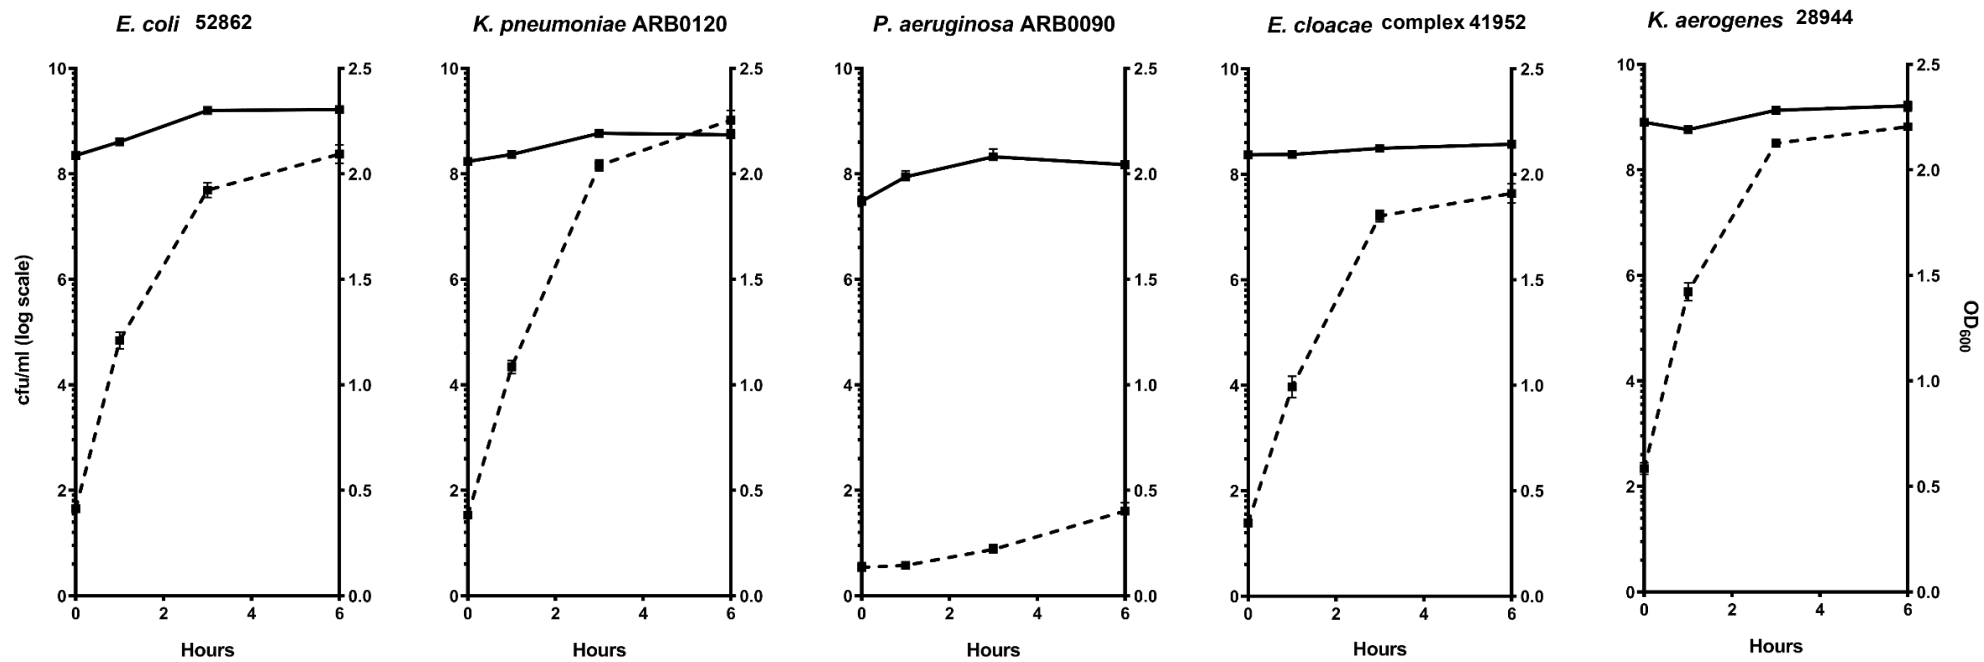

Fig. S4

*E. cloacae* ATCC13047

**A**

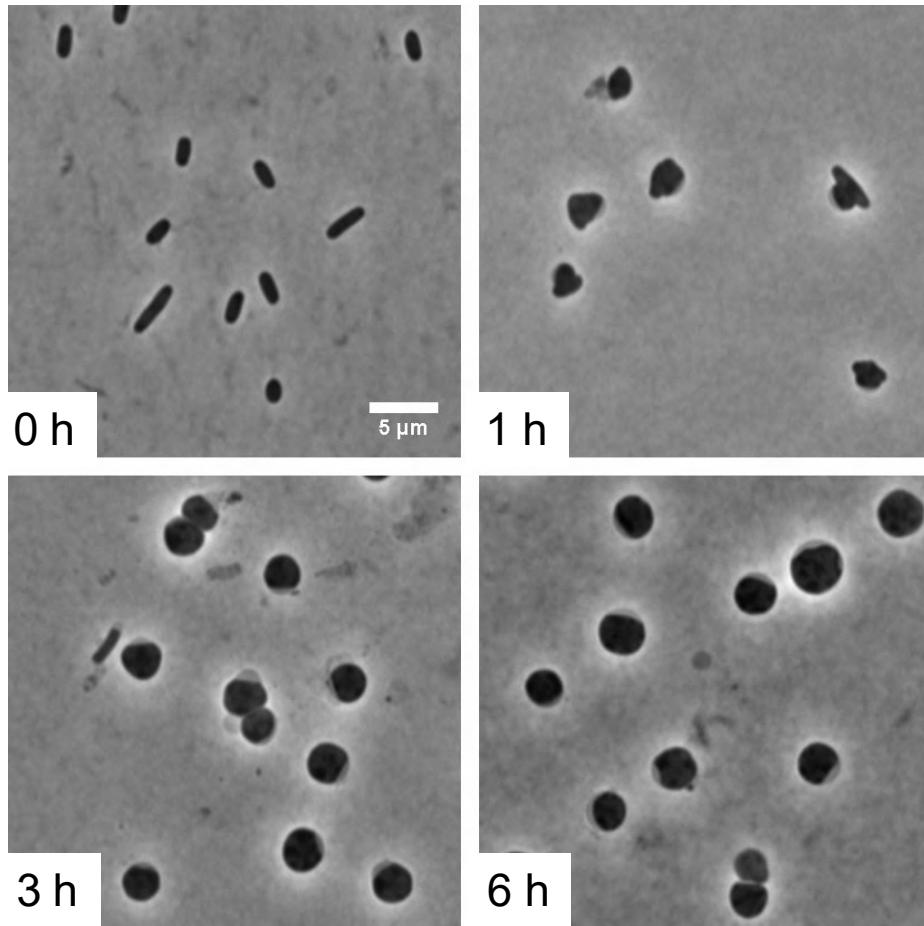

**B**

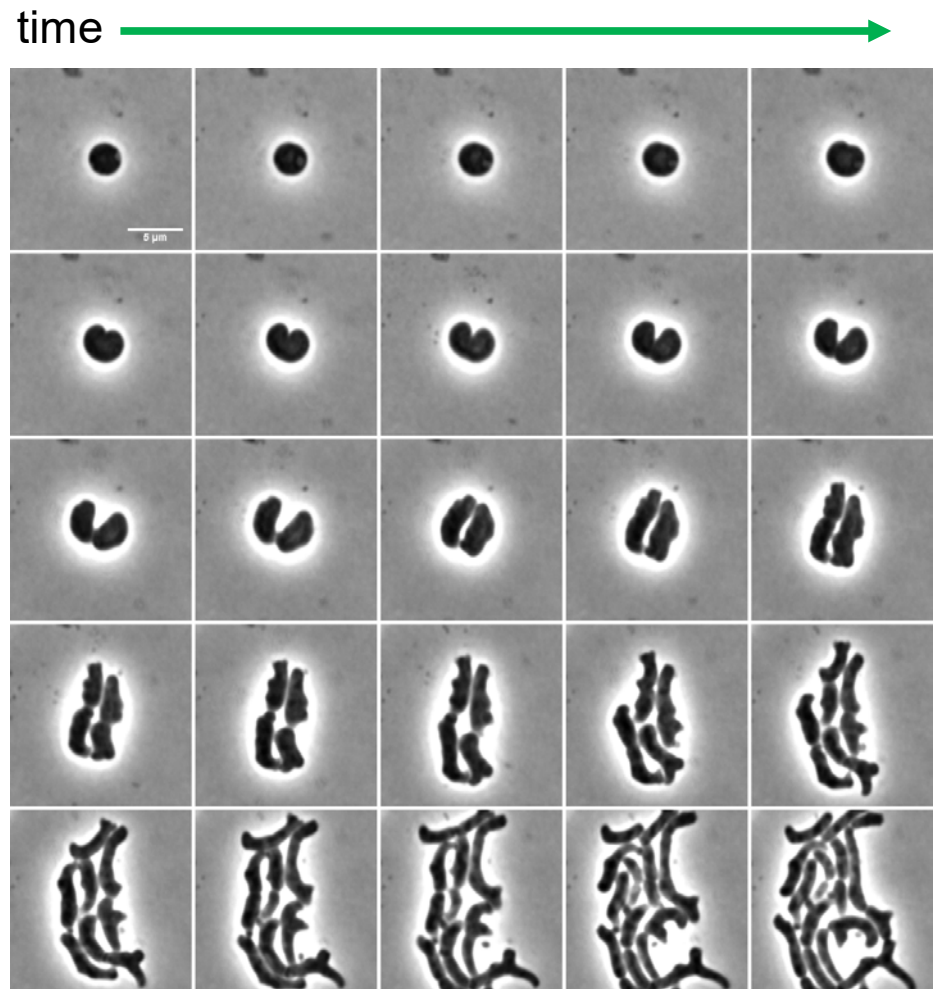

**Fig. S5**

*K. aerogenes* ARB0007

**A**

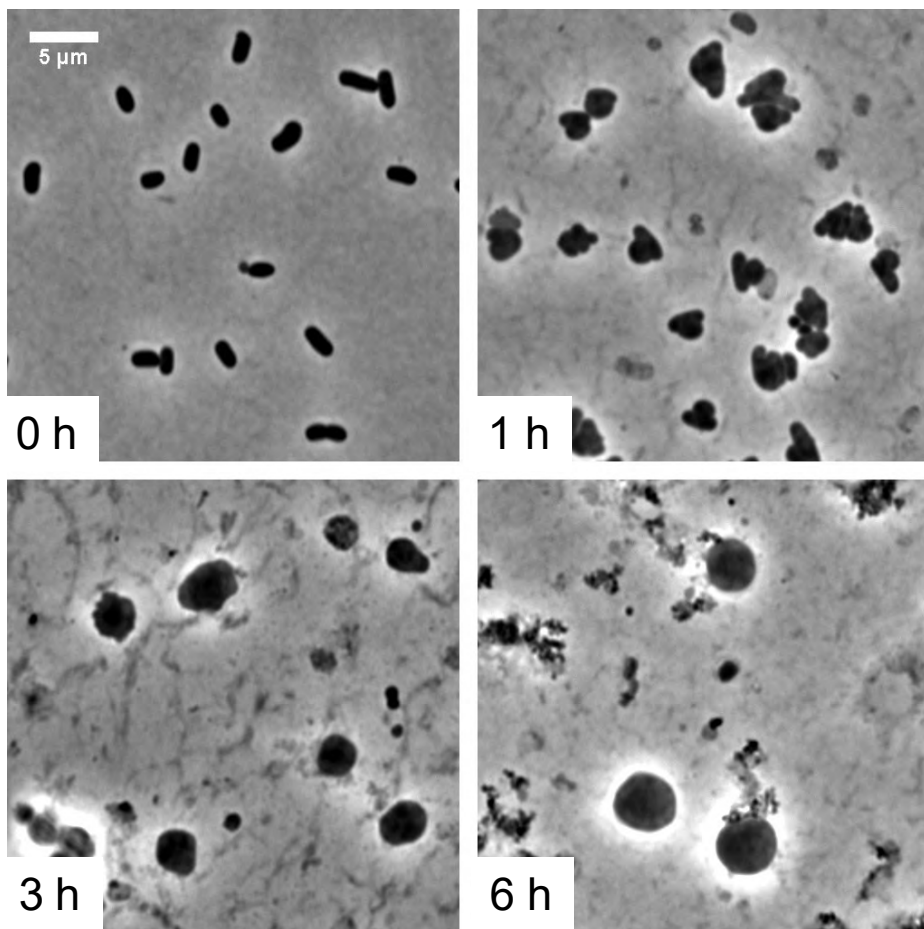

**B**

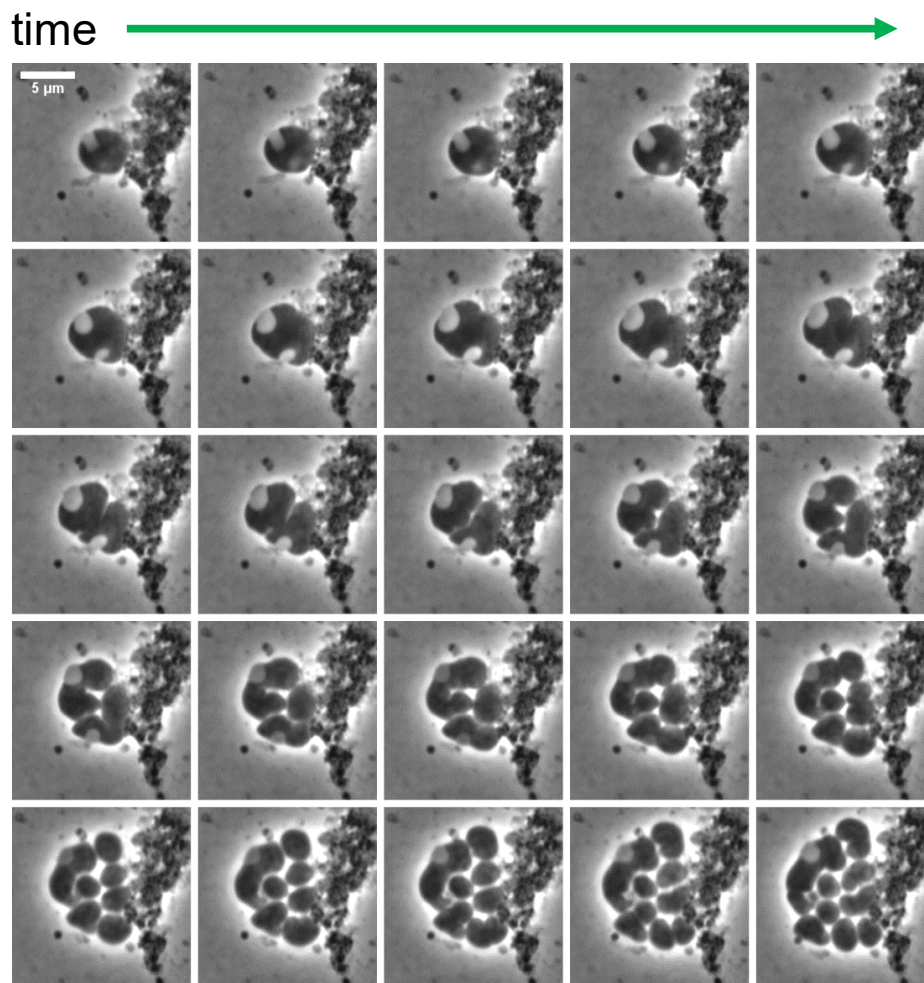

**Fig. S6**

*K. pneumoniae* WCM0002

**A**

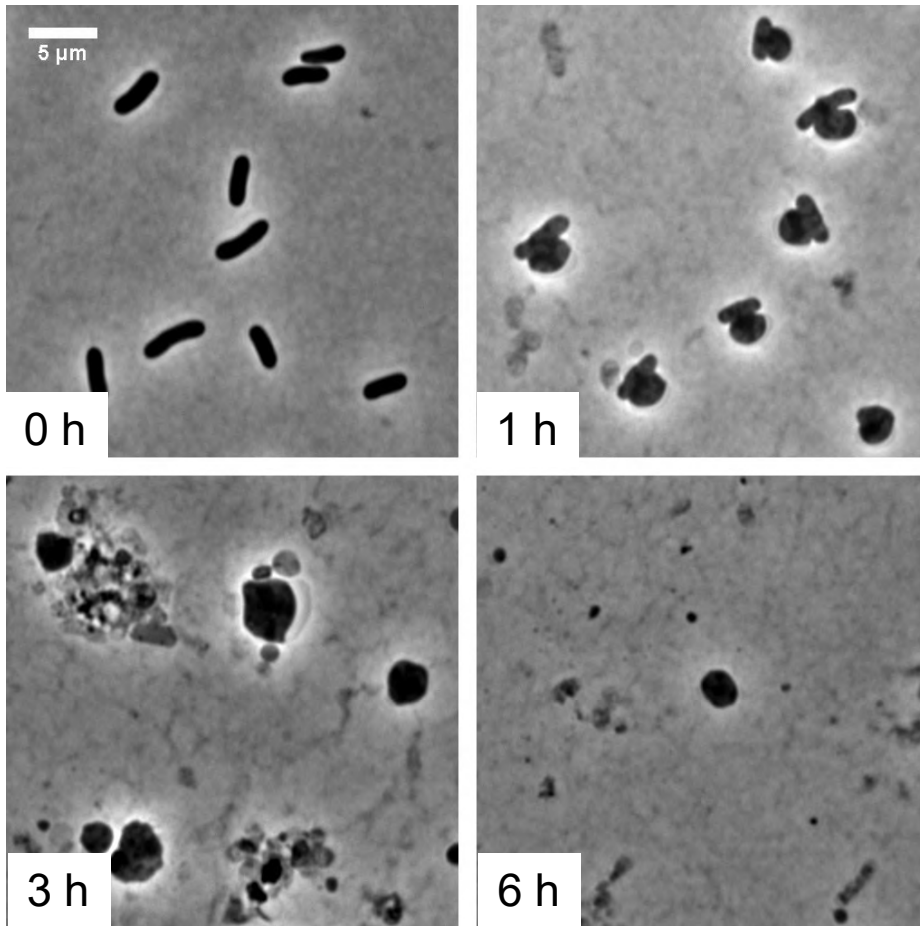

**B**

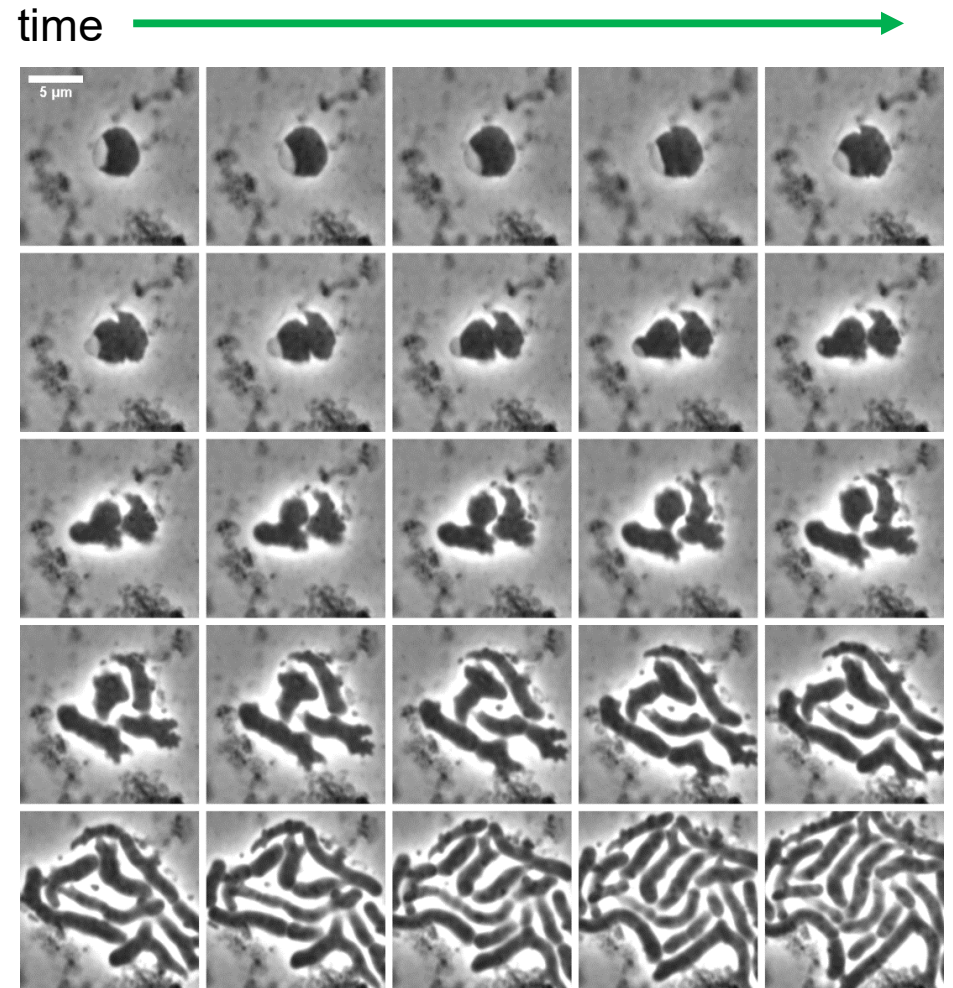

**Fig. S7**

*E. cloacae* ARB0008

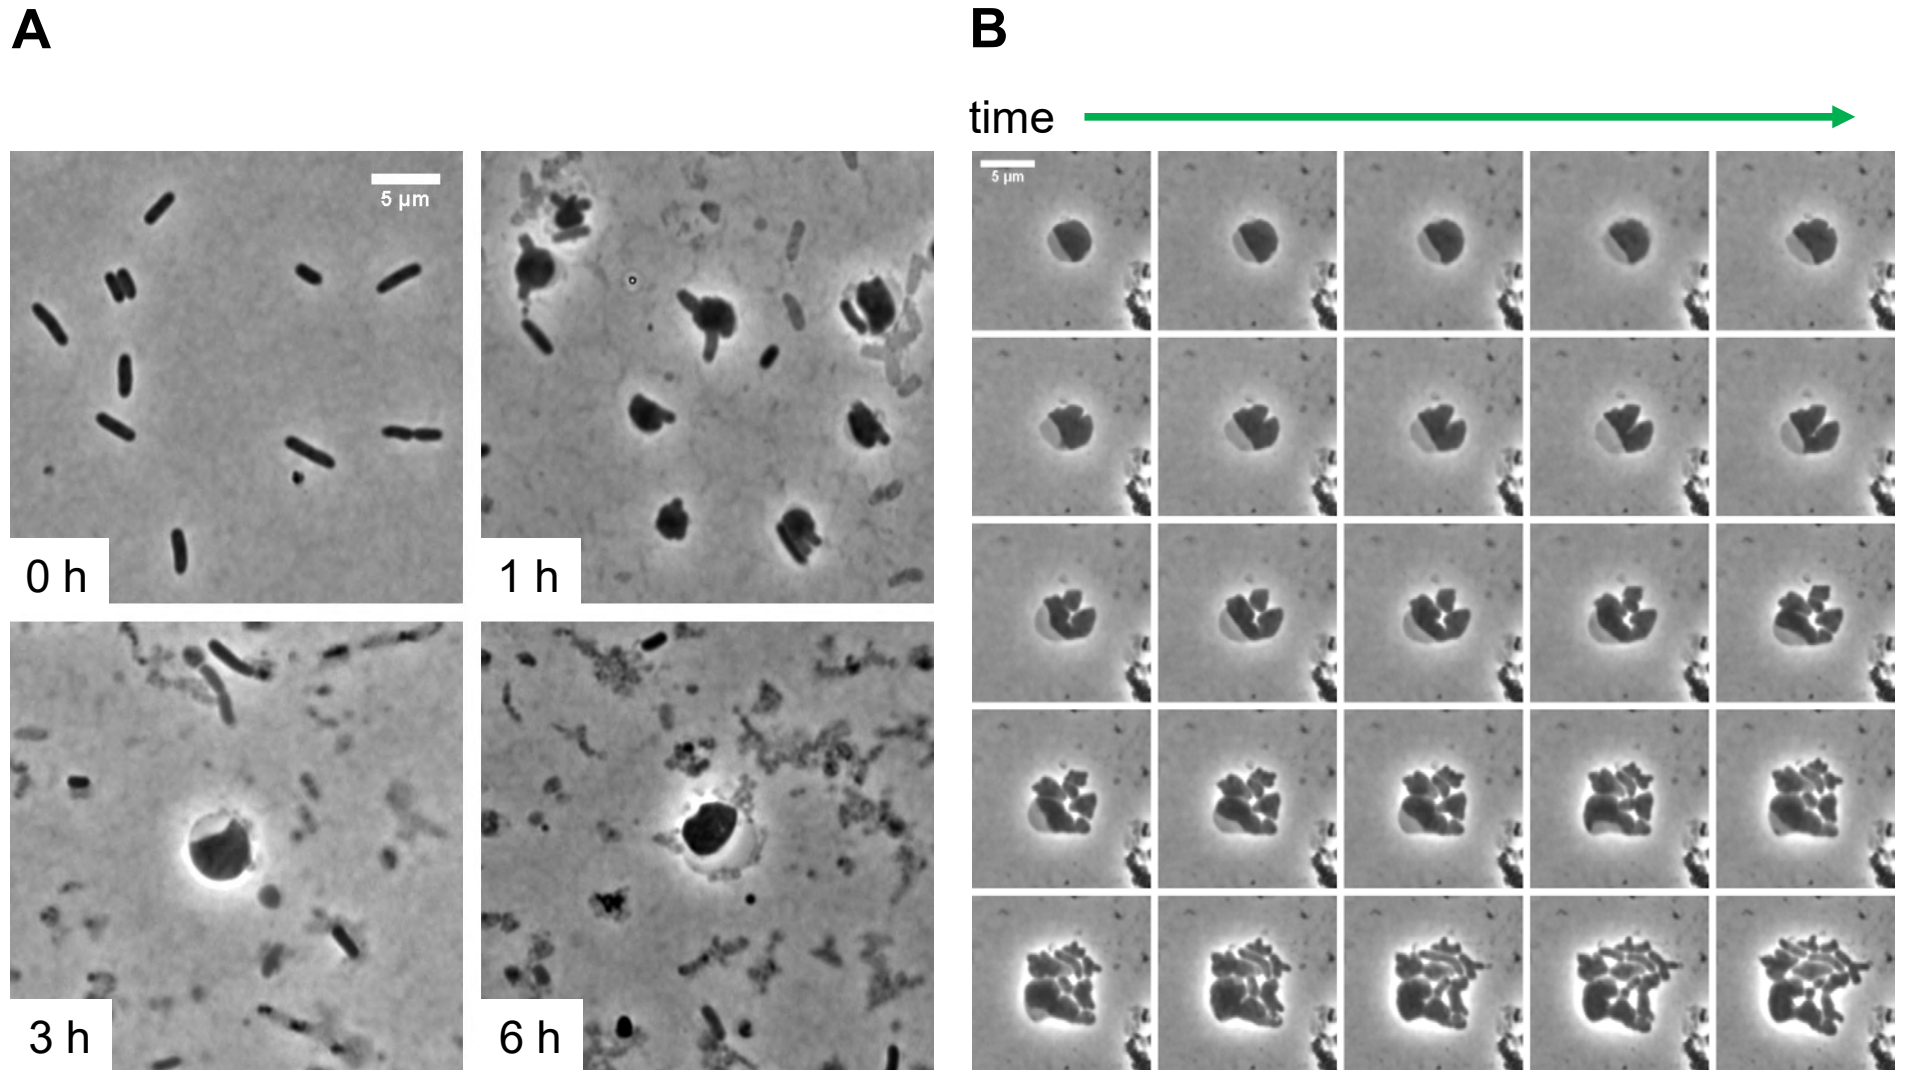

Fig. S8



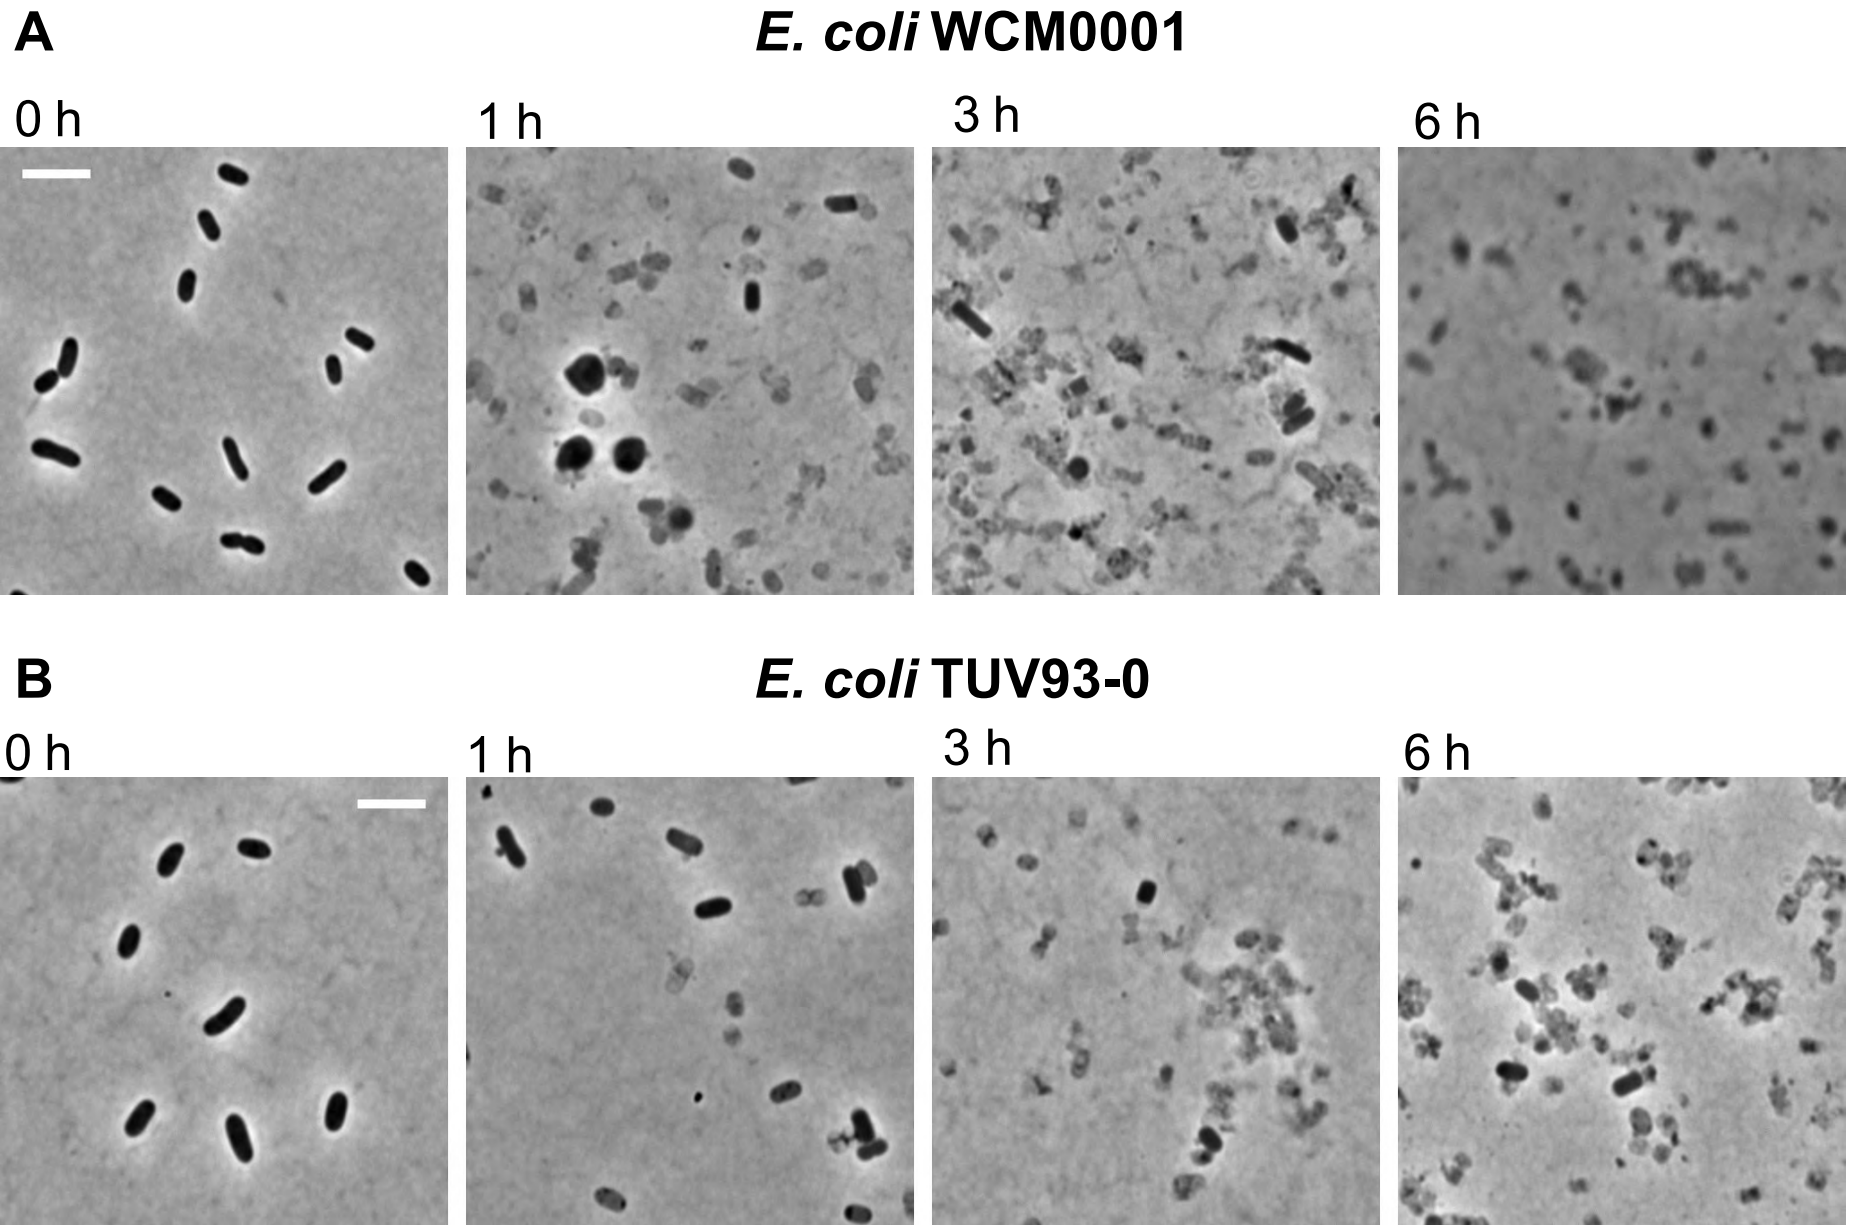

Fig. S9

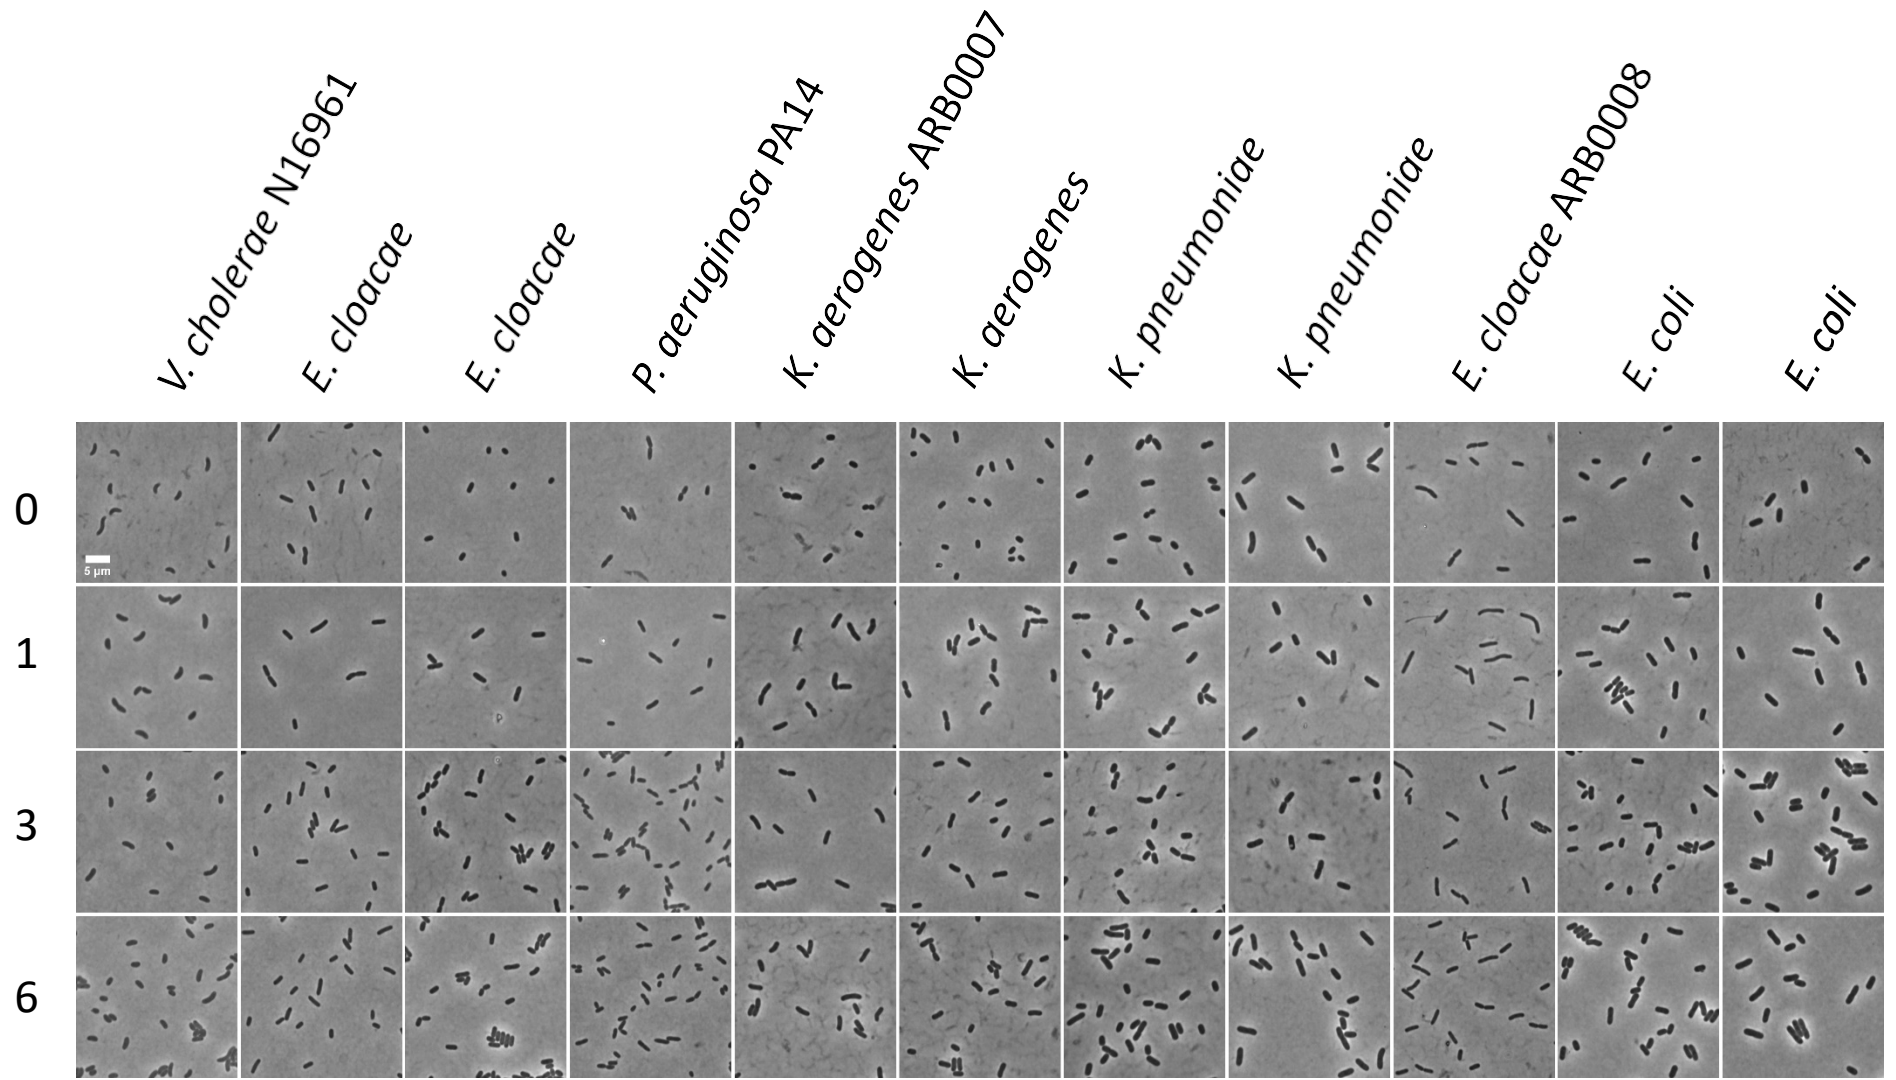

Fig. S10

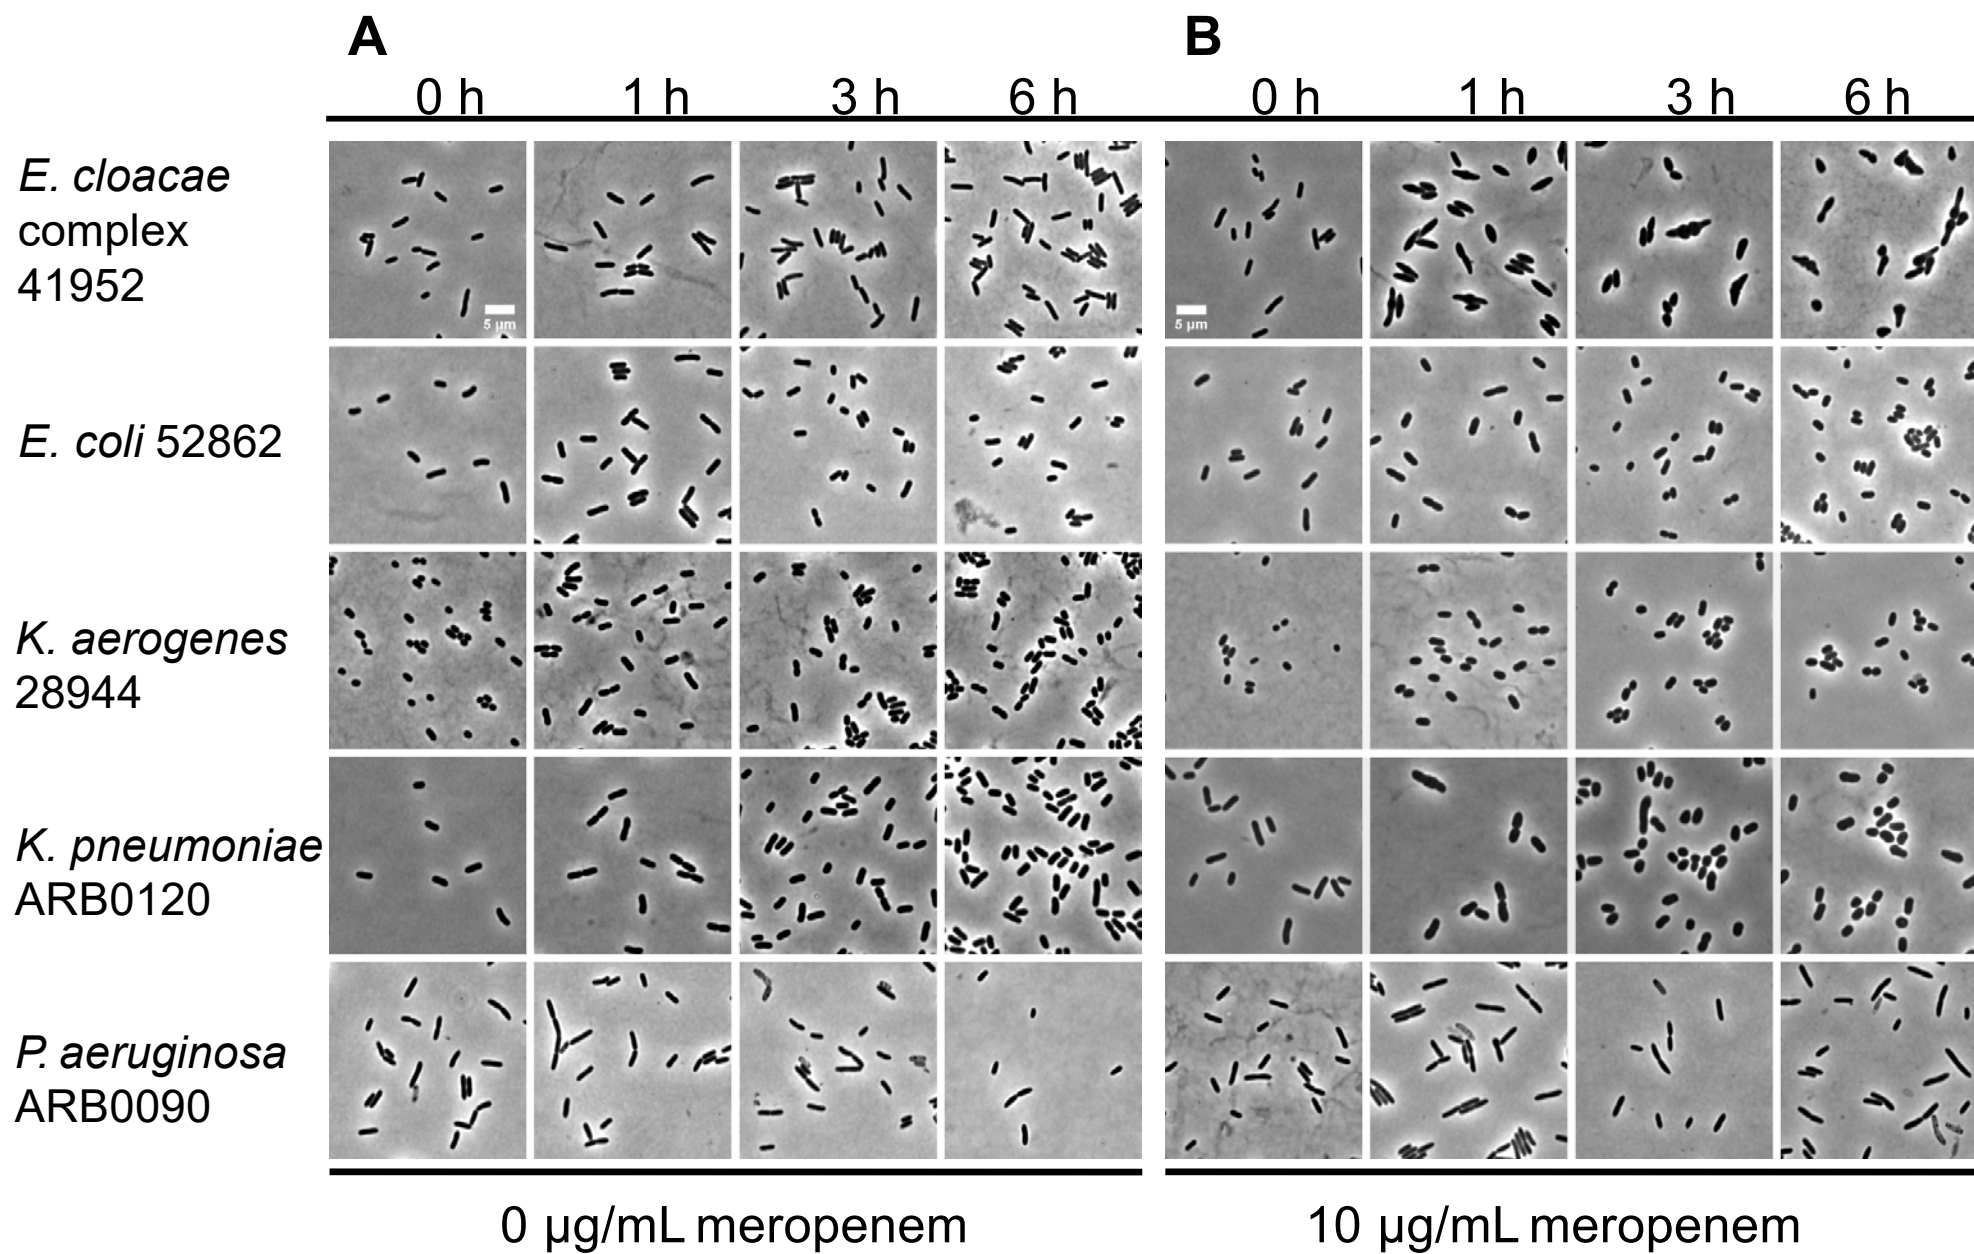

**Fig. S11**

## Supplemental Figure Legends

### Figure S1. Spheroplast formation and recovery in *V. cholerae* N16961

(A) Survival (cfu/mL, blue; OD<sub>600</sub>, red) in the presence of 10 µg/mL meropenem; error bars show the standard error of the mean of three biological replicates. (B) Spheroplast formation at 0, 1, 3, and 6 hours after exposure to 10 µg/mL meropenem. (C) Time-lapse images showing recovery upon removal of meropenem with purified NDM-1 carbapenemase (frames were acquired 5 min apart). Scale bars, 5 µm.

### Figure S2. Spheroplast formation and recovery in *P. aeruginosa* PA14

(A) Survival (cfu/mL, solid lines; OD<sub>600</sub>, dotted lines) in the presence of 10 µg/mL meropenem, error bars show the standard error of the mean of three biological replicates. (B) Spheroplast formation at 0, 1, 3, and 6 hours after exposure to 10 µg/mL meropenem. (C) Time-lapse montage of spheroplasts upon removal of meropenem after 6 hours of treatment. The antibiotic was removed by addition of purified NDM-1 carbapenemase, followed by time-lapse microscopy on BHI+ agarose pads (0.8 % [w/v] agarose). Images were then acquired 5 min apart for another 2 hours. Both *E. coli* isolates were omitted since no spheroplasts were observed after 6 hours of meropenem treatment. Scale bars, 5 µm.

**Figure S3. Growth of susceptible/non-resistant and carbapenemases-producing isolates without antibiotic treatment.**

Growth of the indicated isolates in BHI+ (cfu/mL, solid lines; OD<sub>600</sub>, dotted lines), error bars show standard error of the mean of two biological replicates.

**Figure S4. Growth of KPC-producing *Enterobacteriaceae* in the presence of meropenem.** Growth of the indicated isolates in BHI+ (cfu/mL, solid lines; OD<sub>600</sub>, dotted lines) supplemented with 10 µg/mL meropenem, error bars show standard error of the mean of two biological replicates.

**Figure S5. Spheroplast formation and recovery in *E. cloacae* ATCC 13047**

**(A)** Spheroplast formation at 0, 1, 3, and 6 hours after exposure to 10 µg/mL meropenem in BHI+. **(B)** Time-lapse montage of spheroplast recovery upon removal of meropenem after 6 hours of treatment. The antibiotic was removed by addition of purified NDM-1 carbapenemase, followed by time-lapse microscopy on BHI+ agarose pads (0.8 % [w/v] agarose). Images were acquired 5 min apart for another 2 hours. Scale bars, 5 µm.

**Figure S6. Spheroplast formation and recovery in *K. aerogenes* ARB0007**

**(A)** Spheroplast formation at 0, 1, 3, and 6 hours after exposure to 10 µg/mL meropenem in BHI+. **(B)** Time-lapse montage of spheroplast recovery upon removal of meropenem after 6 hours of treatment. The antibiotic was removed by addition of purified NDM-1 carbapenemase, followed by time-lapse microscopy on BHI+/0.8% (w/v) agarose. Images were acquired 5 min apart for another 2 hours. Scale bars, 5 µm.

**Figure S7. Spheroplast formation and recovery in *K. pneumoniae* WCM0002**

**(A)** Spheroplast formation at 0, 1, 3, and 6 hours after exposure to 10 µg/mL meropenem.

**(B)** Time-lapse montage of spheroplast recovery upon removal of meropenem after 6 hours of treatment. The antibiotic was removed by addition of purified NDM-1 carbapenemase, followed by time-lapse microscopy on BHI+ agarose pads (0.8 % [w/v] agarose). Images were acquired 5 min apart for another 2 hours. Scale bars, 5 µm.

**Figure S8. Spheroplast formation and recovery in *E. cloacae* ARB0008**

**(A)** Spheroplast formation at 0, 1, 3, and 6 hours after exposure to 10 µg/mL meropenem.

**(B)** Time-lapse montage of spheroplast recovery upon removal of meropenem after 6 hours of treatment. The antibiotic was removed by addition of purified NDM-1 carbapenemase, followed by time-lapse microscopy on BHI+ agarose pads (0.8 % [w/v] agarose). Images were acquired 5 min apart for another 2 hours. Scale bars, 5 µm.

**Figure S9. Absence of spheroplasts in *E. coli* isolates.** Overnight cultures of *E. coli* WCM0001 **(A)**, and TUV93-0 **(B)** were subcultured 1:10 (final volume 5 mL) into pre-warmed BHI+ liquid medium supplemented with 10 µg/mL meropenem and imaged at the indicated time points. Scale bar, 5 µm.

**Figure S10. Cell Morphology without antibiotic treatment.** Overnight cultures of the indicated isolates were diluted 10-fold into BHI+ liquid media, and imaged at the indicated time points. Scale bar, 5 µm.

**Figure S11. Cell Morphology of KPC-producing *Enterobacteriaceae*.**

Overnight cultures of the indicated isolates were diluted 10-fold into fresh BHI+ liquid media containing vehicle **(A)**, or meropenem (10 µg/mL) **(B)**, and imaged at the indicated time points. Scale bar, 5 µm.

**Supplemental Movie 1. *E. cloacae* WCM0001 post-meropenem recovery.**

Time-lapse movie of *E. cloacae* WCM0001 spheroplasts upon removal of meropenem after 6 hours of treatment. The antibiotic was removed by addition of purified NDM-1 carbapenemase, followed by time-lapse microscopy on BHI+ agarose pads (0.8 % [w/v] agarose). Images were then acquired 5 min apart for another 2 hours.

**Supplemental Movie 2. *K. aerogenes* WCM0001 post-meropenem recovery.**

Time-lapse movie of *K. aerogenes* WCM0001 spheroplasts upon removal of meropenem after 6 hours of treatment. The antibiotic was removed by addition of purified NDM-1 carbapenemase, followed by time-lapse microscopy on BHI+ agarose pads (0.8 % [w/v] agarose). Images were then acquired 5 min apart for another 2 hours.

**Supplemental Movie 3. *K. pneumoniae* WCM0001 post-meropenem recovery.**

Time-lapse movie of *K. pneumoniae* WCM0001 spheroplasts upon removal of meropenem after 6 hours of treatment. The antibiotic was removed by addition of purified NDM-1 carbapenemase, followed by time-lapse microscopy on BHI+ agarose pads (0.8 % [w/v] agarose). Images were then acquired 5 min apart for another 2 hours.

**Supplemental Movie 4. *V. cholerae* N16961 post-meropenem recovery.**

Time-lapse movie of *V. cholerae* N16961 spheroplasts upon removal of meropenem after 6 hours of treatment. The antibiotic was removed by addition of purified NDM-1 carbapenemase, followed by time-lapse microscopy on BHI+ agarose pads (0.8 % [w/v] agarose). Images were then acquired 5 min apart for another 2 hours.

**Supplemental Movie 5. *P. aeruginosa* PA14 post-meropenem recovery.**

Time-lapse movie of *P. aeruginosa* PA14 spheroplasts upon removal of meropenem after 6 hours of treatment. The antibiotic was removed by addition of purified NDM-1 carbapenemase, followed by time-lapse microscopy on BHI+ agarose pads (0.8 % [w/v] agarose). Images were then acquired 5 min apart for another 2 hours.

**Supplemental Movie 6. *E. cloacae* ATCC 13047 post-meropenem recovery.**

Time-lapse movie of *E. cloacae* ATCC 13047 spheroplasts upon removal of meropenem after 6 hours of treatment. The antibiotic was removed by addition of purified NDM-1 carbapenemase, followed by time-lapse microscopy on BHI+ agarose pads (0.8 % [w/v] agarose). Images were then acquired 5 min apart for another 2 hours.

**Supplemental Movie 7. *K. aerogenes* ARB0007 post-meropenem recovery.**

Time-lapse movie of *K. aerogenes* ARB0007 spheroplasts upon removal of meropenem after 6 hours of treatment. The antibiotic was removed by addition of purified NDM-1 carbapenemase, followed by time-lapse microscopy on BHI+ agarose pads (0.8 % [w/v] agarose). Images were then acquired 5 min apart for another 2 hours.



**Supplemental Movie 8. *K. pneumoniae* WCM0002 post-meropenem recovery.**

Time-lapse movie of *K. pneumoniae* WCM0002 spheroplasts upon removal of meropenem after 6 hours of treatment. The antibiotic was removed by addition of purified NDM-1 carbapenemase, followed by time-lapse microscopy on BHI+ agarose pads (0.8 % [w/v] agarose). Images were then acquired 5 min apart for another 2 hours.

**Supplemental Movie 9. *E. cloacae* ARB0008 post-meropenem recovery.**

Time-lapse movie of *E. cloacae* ARB0008 spheroplasts upon removal of meropenem after 6 hours of treatment. The antibiotic was removed by addition of purified NDM-1 carbapenemase, followed by time-lapse microscopy on BHI+ agarose pads (0.8 % [w/v] agarose). Images were then acquired 5 min apart for another 2 hours.
